# Supplementary material for: TNF is a homoeostatic regulator of distinct epigenetically primed human osteoclast precursors
Source: Ann Rheum Dis. 2021 Mar 10;80(6):748–57. doi: 10.1136/annrheumdis-2020-219262 (PMC8142443; doi:10.1136/annrheumdis-2020-219262)
Supplement: Supplementary data [file annrheumdis-2020-219262supp003.xls]

## Sheet: GO results for R vs NR
TermID	Type	Term	Enrichment	logP	Genes in Term	Target Genes in Term	Fraction of Targets in Term	Total Target Genes	Total Genes	Gene Symbols
GO:0021953	BP	central nervous system neuron differentiation	4.0923e-11	-23.9193	177	67	0.0215712	3106	18054	GATA2,DCLK2,SOX4,SPOCK1,TBX20,NTRK2,HSP90AA1,NR4A2,LBX1,CBLN1,SHH,SPTBN4,EPHB3,EMX1,OLIG2,NKX6-1,BCL11B,DISC1,ZC4H2,WNT3,GDF7,GBX1,SCN1B,FOXN4,SLIT1,GABRB1,EVX1,SALL3,UNCX,WNT5A,ISL2,WNT7A,MDGA1,ARX,B4GALT6,EPHB2,DLL4,PLXNA3,HOXC10,MAP2,EOMES,RAC3,LHX8,PHOX2A,CSF1R,SMO,NKX2-2,GSX2,NANOS1,GLI3,ERBB4,GDPD5,NRP1,MDGA2,ID4,FGFR2,HPRT1,LHX4,OPHN1,FZD1,DMRT3,RORA,DLX5,SOX1,DLX2,EPHA4,DRAXIN
GO:0050770	BP	regulation of axonogenesis	2.2237e-10	-22.2267	183	67	0.0215712	3106	18054	SEMA5B,KIF13B,POU3F2,SEMA4G,PLXNA1,MAP3K13,BRSK2,DRAXIN,EPHA4,LIMK1,MAP1B,PLXND1,SEMA4F,YTHDF1,MAP6,MAP2K1,PLXNA2,LINGO1,NRP1,FN1,DPYSL2,RET,LRP1,STK25,CDH4,NRCAM,MAP2,VEGFA,CXCL12,MACF1,PLXNB1,EPHB2,TIAM1,ZSWIM5,PLXNA3,ABL1,UST,WNT7A,LRP4,WNT5A,NTN1,CHN1,SYNGAP1,MEGF8,NEFL,WNT3,BDNF,ZSWIM4,RTN4R,LPAR3,SHOX2,CRABP2,EPHA7,SHTN1,EPHB3,DISC1,SEMA3F,EFNA1,NKX6-1,PLXNB2,DBN1,CYFIP1,BARHL2,CDK5R1,PTPRS…
GO:0045165	BP	cell fate commitment	3.20608e-10	-21.8608	244	82	0.0264005	3106	18054	TEAD3,TBX20,CYP26B1,GATA2,SOX17,WNT11,BARHL2,TCF3,SHH,DOCK7,ONECUT1,LBX1,OLIG2,TBX1,JAG2,ROR2,GAS1,BCL11B,NKX6-1,MITF,WNT8B,IRF4,WNT3,GDF7,SH3PXD2B,IL7,NR2F2,TBX18,WNT7B,TBX15,EPOP,DLL1,GBX1,NRG1,FOXA1,HNF1B,EVX1,FOXN4,ISL2,MESP1,WNT7A,EBF2,GSC,WNT2B,CDON,WNT5A,SOX13,ARX,KLF4,BMP4,DLL4,TBX21,SMAD1,EOMES,HOXC10,WNT9A,SMO,SOX18,NOTCH3,GLI3,ERBB4,SPRY2,NKX2-2,GSX2,PAX2,FGFR2,HOXA11,ZNF521,WNT10A,NRP…
GO:0030018	CC	Z disc	7.28552e-10	-21.04	132	52	0.016134	3223	18985	ANK3,MYL9,SCN5A,FKBP1B,PDE4B,AHNAK2,MYOM2,SYNPO,STUB1,DMD,SYNC,C10orf71,FLNB,OBSL1,HOMER1,FBXO32,MYBPC2,LDB3,GLRX3,MYBPC1,MYOZ3,DST,CACNA1C,FHOD3,BIN1,BAG3,NOS1AP,PSEN2,FLNC,JPH1,SCN3B,PARVB,XIRP2,DNAJB6,ANK2,PGM5,SCN8A,PDLIM2,JUP,NEXN,SYNE2,PDLIM1,ANK1,DES,HRC,HSPB1,SYNPO2L,CACNA1D,PALLD,IGSF22,CSRP2,FLNA
GO:0050803	BP	regulation of synapse structure or activity	1.71093e-09	-20.1862	227	76	0.0244688	3106	18054	UBE3A,SNCA,GPC4,ARHGAP22,SRCIN1,C1QL3,ABHD17C,BDNF,LRP8,ASIC2,NTN1,SYNGAP1,WNT5A,FLRT1,WNT7A,LRP4,CUX2,CAMK1,LRFN4,ADGRB2,SLIT1,SLITRK5,ABL1,CDH2,NTRK2,PTPRS,CDK5R1,CBLN1,HOMER1,ADGRB3,CYFIP1,NGEF,ARHGAP33,DNM1,DBN1,CTTNBP2,IGSF9,NLGN1,EFNA1,SEMA3F,APP,DISC1,EPHB3,AGRN,PRNP,NTRK1,ITPKA,SIX4,EPHA7,NEDD4,NEUROD2,ABI2,PCDH8,NECTIN1,SIX1,DLG5,EPHA4,FZD1,SEPTIN11,SYBU,FYN,PPT1,DAB2IP,ADGRL1,GPM6A,TPBG…
GO:0060070	BP	canonical Wnt signaling pathway	2.65867e-09	-19.7454	88	39	0.0125563	3106	18054	KLF4,SOX17,WNT11,FZD5,NR4A2,LRP5,SHH,FZD3,FZD6,TCF7L1,MITF,EGF,DISC1,WNT9A,FZD2,WNT7B,AMER1,WNT3,PYGO1,FZD7,PORCN,DVL1,FZD8,WNT8B,WNT10A,RARG,TCF7,SFRP4,FZD1,BCL9,SDC1,FZD4,SFRP2,CAV1,CSNK1E,GLI1,WNT5A,WNT7A,WNT2B
GO:0031674	CC	I band	6.37107e-09	-18.8715	143	53	0.0164443	3223	18985	C10orf71,SYNC,DMD,STUB1,MYBPC1,DST,MYOZ3,FLNB,LDB3,HOMER1,GLRX3,MYBPC2,FBXO32,FERMT2,OBSL1,FKBP1B,ANK3,MYL9,SCN5A,SYNPO,MYOM2,AHNAK2,PDE4B,PARVB,JPH1,SCN3B,DNAJB6,XIRP2,ANK2,CACNA1C,FHOD3,PSEN2,FLNC,BIN1,BAG3,NOS1AP,JUP,NEXN,PGM5,SCN8A,PDLIM2,IGSF22,FLNA,CSRP2,PDLIM1,SYNE2,SYNPO2L,PALLD,CACNA1D,HSPB1,DES,ANK1,HRC
GO:0050807	BP	regulation of synapse organization	8.72986e-09	-18.5565	218	72	0.0231809	3106	18054	ABL1,SLITRK5,SLIT1,ADGRB2,CAMK1,LRFN4,CUX2,LRP4,WNT7A,FLRT1,WNT5A,NTN1,ASIC2,LRP8,BDNF,ABHD17C,SRCIN1,C1QL3,ARHGAP22,GPC4,SNCA,UBE3A,EPHA7,SIX4,ITPKA,NTRK1,AGRN,PRNP,EPHB3,APP,DISC1,SEMA3F,NLGN1,EFNA1,IGSF9,CTTNBP2,DBN1,ARHGAP33,NGEF,ADGRB3,CYFIP1,HOMER1,CBLN1,CDK5R1,PTPRS,NTRK2,CDH2,FYN,SEPTIN11,FZD1,EPHA4,DLG5,NECTIN1,SIX1,PCDH8,ABI2,NEUROD2,NEDD4,BAIAP2,ADGRB1,NRCAM,CLSTN2,ARHGAP44,LRTM2,MDGA1…
GO:0048705	BP	skeletal system morphogenesis	1.18497e-08	-18.251	236	76	0.0244688	3106	18054	VWA1,FBN2,P2RX7,MMP14,COL12A1,ALX3,COL13A1,WNT9A,SERPINH1,SMAD3,BMP4,WDR60,DHRS3,HOXC4,NPPC,CCN2,HOXD9,SIX2,INPPL1,SFRP2,OSR2,MSX2,DLX5,NKX3-2,MATN3,SIX1,SGPL1,FOXC2,DLX2,NOG,FGF18,MTHFD1,HOXA6,GLI3,MTHFD1L,FGFR2,HOXA11,SFRP4,TWIST1,TBX1,ROR2,IMPAD1,SIX4,SKI,HAS2,PLEKHA1,TIFAB,FGFR3,RFLNA,SLC39A3,CYP26B1,MATN2,BARX2,HHIP,FGFR1,LRP5,COCH,FMN1,MSX1,CSGALNACT1,RAB23,IRX5,UNCX,LTBP3,SP5,AXIN2,GSC,WNT…
GO:0035108	BP	limb morphogenesis	1.39012e-08	-18.0913	148	54	0.0173857	3106	18054	WNT9A,RSPO2,FAM92A,ALX3,IMPAD1,ZNF219,SKI,ROR2,FZD6,ZNF141,HOXC10,FBN2,MSX1,FMN1,FGFR1,SHH,AFF3,DLX6,CYP26B1,PCSK5,EN1,SOX4,BMP4,COL2A1,LRP4,WNT7A,NOG,MAP3K20,TRAF3IP1,WNT5A,SALL3,MSX2,LMBR1,DLX5,SFRP2,OSR2,HOXD9,RNF165,SHOX2,HOXA11,CRABP2,TWIST1,FGFR2,CACNA1C,BMPR1A,SP8,RARG,SALL4,PLXNA2,WNT3,BAK1,MEGF8,GLI3,ZBTB16
GO:0035107	BP	appendage morphogenesis	1.39012e-08	-18.0913	148	54	0.0173857	3106	18054	TWIST1,SHOX2,HOXA11,CRABP2,BMPR1A,CACNA1C,SP8,FGFR2,RARG,SALL4,PLXNA2,WNT3,BAK1,GLI3,MEGF8,ZBTB16,LRP4,COL2A1,WNT7A,NOG,TRAF3IP1,MAP3K20,SALL3,WNT5A,LMBR1,MSX2,DLX5,OSR2,SFRP2,RNF165,HOXD9,FMN1,MSX1,FGFR1,SHH,DLX6,AFF3,EN1,CYP26B1,PCSK5,SOX4,BMP4,WNT9A,RSPO2,FAM92A,ALX3,ZNF219,SKI,IMPAD1,ROR2,ZNF141,FBN2,HOXC10,FZD6
GO:0001227	BP	DNA-binding transcription repressor activity, RNA polymerase II-specific	1.71274e-08	-17.8826	242	77	0.0247907	3106	18054	ARID5A,ZNF536,TCF7,YY1,INSM1,SNAI3,E4F1,PRKN,ZNF148,FOXK1,TFAP2C,CREB3L1,SNAI1,NKX3-2,CHCHD3,MSX2,HOXD9,TBX21,ETV6,ARX,VAX1,EMX2,HES7,BATF3,HEYL,MLXIPL,E2F7,GCFC2,PPARD,IRX2,FOXK2,TBX15,DACH1,PRDM5,GLIS1,SATB1,YBX3,ZBTB16,E2F8,KLF12,TBX18,CUX2,ZBTB4,GSC,JDP2,THAP11,OVOL2,HSF1,ELK3,DMBX1,KCNIP3,SCRT1,CC2D1A,MYC,ZNF239,TCF3,MSX1,INSM2,ZFP90,ZNF202,NR2F6,EN1,PPARA,PURG,HMGA2,NKX6-1,ZNF205,SCRT2,MITF…
GO:0030426	CC	growth cone	1.994e-08	-17.7305	171	59	0.0183059	3223	18985	SNAP25,MYH10,GDPD5,NPTX2,TUBB3,DLG3,NRP1,PCDH9,ADGRL1,APBB1,DTNBP1,DPYSL3,TSHZ3,MAP2,GPM6A,NGEF,RTN4R,GPRIN1,CDK5R1,LAMP5,TIAM2,CBARP,FKBP4,ITGA3,TIAM1,LRP1,IGF2BP1,CCDC120,ANG,CYTH2,SHTN1,SNCA,DVL1,HSP90AA1,DBN1,NEFL,NECTIN1,AUTS2,BOC,TSC1,EPHA4,PALLD,FSCN1,UNC5C,NDRG2,APP,CXADR,DOCK7,NPTXR,ACAP3,RAC3,AMFR,CYFIP1,MAP1B,ERC2,WHRN,IGHMBP2,DISC1,CDK5R2
GO:0021510	BP	spinal cord development	3.69458e-08	-17.1138	106	42	0.0135222	3106	18054	GBX1,MDGA2,DLL1,ZC4H2,NKX2-2,GSX2,GLI3,CHRD,GDF7,NEFL,GDPD5,UNCX,SOX1,ISL2,NOG,DRAXIN,DRGX,FOXN4,LHX4,SOX12,DMRT3,SRD5A1,EVX1,PHGDH,LBX1,SHH,DLL4,PTPRS,LOXL3,MDGA1,GATA2,SOX4,TBX20,BAG3,NKX6-1,MPST,SMO,HOXC10,OLIG2,NEUROG3,GDF11,PHOX2A
GO:0030427	CC	site of polarized growth	6.46692e-08	-16.554	176	59	0.0183059	3223	18985	LRP1,CBARP,TIAM2,FKBP4,TIAM1,ITGA3,GPRIN1,LAMP5,CDK5R1,NGEF,GPM6A,RTN4R,MAP2,APBB1,DTNBP1,TSHZ3,DPYSL3,DLG3,TUBB3,PCDH9,ADGRL1,NRP1,GDPD5,SNAP25,MYH10,NPTX2,WHRN,ERC2,MAP1B,CYFIP1,DISC1,IGHMBP2,CDK5R2,RAC3,AMFR,ACAP3,NPTXR,CXADR,DOCK7,PALLD,FSCN1,EPHA4,TSC1,BOC,AUTS2,APP,NDRG2,UNC5C,DVL1,HSP90AA1,NECTIN1,DBN1,NEFL,SNCA,SHTN1,CYTH2,CCDC120,ANG,IGF2BP1
GO:0048736	BP	appendage development	8.14522e-08	-16.3232	179	60	0.0193175	3106	18054	GLI3,BAK1,MEGF8,WNT3,ZBTB16,NR2F2,FGFR2,BMPR1A,CACNA1C,SP8,SHOX2,CRABP2,HOXA11,TWIST1,SALL4,PLXNA2,RARG,ITGB4,SFRP2,OSR2,LMBR1,MSX2,DLX5,HOXD9,RNF165,NOG,COL2A1,WNT7A,LRP4,WNT5A,PAM,SALL3,TRAF3IP1,MAP3K20,SOX4,PCSK5,SLC39A3,CYP26B1,EN1,ITGA6,BMP4,RAX,FGFR1,SHH,FMN1,MSX1,DLX6,AFF3,IMPAD1,SKI,ZNF219,ALX3,FZD6,ZNF141,HOXC10,FBN2,ROR2,WNT9A,FAM92A,RSPO2
GO:0060173	BP	limb development	8.14522e-08	-16.3232	179	60	0.0193175	3106	18054	SOX4,EN1,SLC39A3,CYP26B1,PCSK5,ITGA6,BMP4,RAX,SHH,FGFR1,MSX1,FMN1,DLX6,AFF3,SKI,ZNF219,IMPAD1,ALX3,ZNF141,HOXC10,FBN2,FZD6,ROR2,WNT9A,FAM92A,RSPO2,GLI3,BAK1,MEGF8,WNT3,ZBTB16,NR2F2,SP8,BMPR1A,CACNA1C,FGFR2,TWIST1,HOXA11,SHOX2,CRABP2,SALL4,PLXNA2,RARG,OSR2,ITGB4,SFRP2,LMBR1,MSX2,DLX5,HOXD9,RNF165,NOG,LRP4,COL2A1,WNT7A,SALL3,WNT5A,PAM,TRAF3IP1,MAP3K20
GO:0003205	BP	cardiac chamber development	8.36055e-08	-16.2972	171	58	0.0186735	3106	18054	SHOX2,FGFR2,TGFBR3,XIRP2,BMPR1A,NRP1,PPP1R13L,NRG1,SALL4,LTBP1,SAV1,SNX17,ENG,PLXND1,FZD2,RXRA,ADAMTS1,MESP1,FOXC2,NOG,OVOL2,ZFPM2,WNT5A,MIR17HG,HEG1,CPE,ANK2,MSX2,SMAD6,SFRP2,FOXF1,FZD1,PKP2,SMARCD3,DLL4,TAB1,RBP4,LUZP1,FGFRL1,DNAH11,PCSK5,DHRS3,VANGL2,TBX20,SOX4,BMP4,WNT11,MYH10,CRELD1,FOXH1,SMO,DSP,CCN1,SCN5A,PTK7,MATR3,TBX1,HEYL
GO:0019199	MF	transmembrane receptor protein kinase activity	1.35802e-07	-15.8121	81	35	0.0111857	3129	17306	MERTK,NTRK1,EPHA7,MET,EPHB2,LTBP4,RET,EPHA6,CRIM1,ACVRL1,FGFR4,INSR,FLT1,NRP1,DDR1,LTBP1,FGFR2,ROR2,EPHB6,FGFR3,TYRO3,EPHA1,FGFRL1,TGFBR3,ERBB3,NTRK2,BMPR1A,EPHA4,ERBB4,EPHB3,CSF1R,ROR1,ACVR1C,KIT,FGFR1
GO:0060485	BP	mesenchyme development	1.42091e-07	-15.7668	219	69	0.0222151	3106	18054	ZFPM2,SIX1,DLG5,SNAI1,NOG,SPRY1,FOXC2,FOXD1,SIX2,WT1,MSX2,SEMA4G,ERBB3,SEMA5B,FOXF1,SFRP2,WNT10A,NRP1,MEOX1,TWIST1,BMPR1A,PAX2,FGFR2,SEMA4F,EDNRB,ERBB4,PTK7,POGLUT1,SMO,HEYL,LAMA5,RET,EOMES,FN1,ADAM15,BMP4,SMAD3,FOXH1,LOXL3,CRELD1,OVOL2,WNT5A,RBM24,GSC,YAP1,MESP1,ACVRL1,NRG1,LOXL2,KITLG,TAPT1,TGFBR3,AMER1,PDCD6,ENG,EFNA1,HMGA2,SEMA3F,TBX1,HAS2,SIX4,BNC2,EFNB1,MSX1,FBXL17,SHH,FGFR1,WNT11,TBX20
GO:0001217	MF	DNA-binding transcription repressor activity	1.4632e-07	-15.7375	242	77	0.0246085	3129	17306	ZNF202,ZFHX3,THAP11,TBX21,VAX1,DLX4,GSC,E2F8,JDP2,YBX3,ZNF239,MSX1,HOXD9,CUX2,FOXK1,TBX15,EMX2,IRX2,EMX1,HES7,ARX,VAX2,SCRT2,GCFC2,ZNF536,LRRFIP1,PPARD,NKX6-1,FOXK2,ZBTB4,NR2F6,ZFP90,NEUROG3,MITF,TFAP2C,HEYL,MSX2,CC2D1A,ZBTB16,SCRT1,INSM2,OVOL2,PPARA,HMGA2,INSM1,ETV6,BATF3,BACH2,PURG,TCF3,GLIS1,HSF1,EN1,DACH1,NKX3-2,KLF12,CREB3L1,CHCHD3,KCNIP3,ZNF219,SATB1,ZNF205,TBX18,E2F7,MLXIPL,SNAI1,ELK3,SNAI…
GO:0001227	MF	DNA-binding transcription repressor activity, RNA polymerase II-specific	1.4632e-07	-15.7375	242	77	0.0246085	3129	17306	IRX2,EMX2,CUX2,FOXK1,TBX15,HOXD9,YBX3,ZNF239,MSX1,DLX4,GSC,E2F8,JDP2,VAX1,ZFHX3,ZNF202,THAP11,TBX21,OVOL2,PPARA,HMGA2,SCRT1,INSM2,ZBTB16,MSX2,CC2D1A,MITF,TFAP2C,HEYL,PPARD,LRRFIP1,NKX6-1,FOXK2,NR2F6,ZBTB4,NEUROG3,ZFP90,ARX,VAX2,SCRT2,GCFC2,ZNF536,EMX1,HES7,KCNIP3,CREB3L1,CHCHD3,NKX3-2,KLF12,HSF1,DACH1,EN1,ETV6,PURG,BATF3,BACH2,TCF3,GLIS1,INSM1,ZNF148,E4F1,TCF7,PRDM5,MYC,ARID5A,DMBX1,YY1,PRKN,ELK3…
GO:0021515	BP	cell differentiation in spinal cord	1.52946e-07	-15.6932	54	26	0.0083709	3106	18054	NKX6-1,SOX1,ISL2,DRAXIN,FOXN4,LHX4,HOXC10,EVX1,PHOX2A,OLIG2,DMRT3,LBX1,MDGA2,GBX1,DLL4,SHH,GSX2,MDGA1,GATA2,ZC4H2,NKX2-2,GDF7,GDPD5,GLI3,SOX4,TBX20
GO:0048754	BP	branching morphogenesis of an epithelial tube	1.61974e-07	-15.6358	130	47	0.015132	3106	18054	AREG,BMP4,CASR,TBX20,VANGL2,FGF2,CTNNBIP1,PGF,NKX3-1,HHIP,LRP5,SHH,DLL4,DDR1,LAMA5,MMP14,RSPO2,ESR1,VEGFA,EGF,PLXND1,GLI3,ENG,GDF7,SPRY2,NRP1,FOXA1,MET,FGFR2,CELSR1,PAX2,HOXA11,NRARP,WT1,MYC,FOXF1,SFRP2,HNF1B,MSX2,WNT5A,SIX1,CITED1,FOXD1,YAP1,FOXC2,SPRY1,DLG5
GO:0001763	BP	morphogenesis of a branching structure	1.70571e-07	-15.5841	166	56	0.0180296	3106	18054	EGF,ESR1,VEGFA,RSPO2,COL13A1,EPHA7,SOCS3,MMP14,LAMA5,DDR1,DLL4,FGFR1,SHH,LRP5,HHIP,NKX3-1,FZD5,PGF,FGF2,TBX20,VANGL2,CTNNBIP1,BMP4,CASR,AREG,DLG5,CITED1,YAP1,FOXD1,NOG,FOXC2,DLX2,SPRY1,WNT5A,SIX1,MSX2,SFRP2,FOXF1,HNF1B,MYC,WT1,PLXNA1,RSPO3,HOXA11,NRARP,FGFR2,CELSR1,PAX2,FOXA1,NRP1,MET,GDF7,SPRY2,ENG,GLI3,PLXND1
GO:0016331	BP	morphogenesis of embryonic epithelium	2.20744e-07	-15.3263	143	50	0.0160979	3106	18054	LUZP1,SDC4,TSC2,VANGL2,SOX4,TRIM71,BMP4,IRX3,PDX1,PRKACB,PTK7,PLXNB2,KDM2B,SKI,IRX2,FZD3,JAG2,RET,FZD6,LAMA5,TWIST1,CELSR1,FGFR2,PAX2,RARG,MTHFD1L,LHX2,SALL4,DVL1,PCDH8,GDF7,APAF1,WNT7B,TBX18,FZD2,MIB1,MTHFD1,PRICKLE1,NOG,OVOL2,ALDH1A3,WNT5A,TSC1,VEGFC,SIX1,ABL1,SFRP2,CC2D2A,HNF1B,FZD1
GO:0042471	BP	ear morphogenesis	3.17353e-07	-14.9633	117	43	0.0138442	3106	18054	PTK7,TIFAB,SIX4,FZD6,TBX1,FZD3,ROR2,SOBP,EPHB2,FGFR1,WHRN,HMX2,MSX1,KCNQ4,BCR,DLX6,LRIG1,GJB6,VANGL2,GATA2,TMIE,NOG,GSC,COL2A1,WNT5A,SIX1,ALDH1A3,NTN1,ABR,HMX3,OSR2,DLX5,NKX3-2,ATP8A2,SIX2,FGFR2,CELSR1,PAX2,TWIST1,DVL1,SPRY2,NAGLU,FZD2
GO:0061138	BP	morphogenesis of a branching epithelium	3.52159e-07	-14.8592	157	53	0.0170637	3106	18054	VANGL2,TBX20,FGF2,CTNNBIP1,BMP4,CASR,AREG,DLL4,HHIP,SHH,FGFR1,LRP5,NKX3-1,FZD5,PGF,SOCS3,MMP14,LAMA5,DDR1,EGF,ESR1,VEGFA,RSPO2,GDF7,SPRY2,GLI3,ENG,PLXND1,HOXA11,NRARP,CELSR1,FGFR2,PAX2,FOXA1,NRP1,MET,MSX2,FOXF1,SFRP2,HNF1B,MYC,PLXNA1,WT1,RSPO3,DLG5,YAP1,CITED1,FOXD1,NOG,SPRY1,FOXC2,WNT5A,SIX1
GO:0004714	MF	transmembrane receptor protein tyrosine kinase activity	4.69406e-07	-14.5718	64	29	0.00926814	3129	17306	EPHB3,CSF1R,ROR1,FGFR1,NRP1,KIT,EPHA4,CRIM1,FLT1,ERBB4,FGFR4,INSR,EPHB2,FGFRL1,NTRK2,RET,ERBB3,EPHA6,FGFR2,DDR1,EPHA1,NTRK1,EPHA7,MET,MERTK,ROR2,EPHB6,TYRO3,FGFR3
GO:0009953	BP	dorsal/ventral pattern formation	4.87606e-07	-14.5338	81	33	0.0106246	3106	18054	HHIP,SHH,DLL4,LMX1B,TBX20,EN1,BMP4,SMO,NKX6-1,NBL1,VAX2,SP8,BMPR1A,HOXA11,LHX2,FOXA1,GLI3,WNT8B,CHRD,WNT3,NKX2-2,GSX2,NOG,WNT7A,LRP4,GSC,GLI1,SOX1,OVOL2,DMRT3,SMAD6,EVX1,FOXN4
GO:0061448	BP	connective tissue development	5.61912e-07	-14.3919	222	68	0.0218931	3106	18054	AMER1,ZBTB16,SH3PXD2B,WNT7B,TAPT1,SHOX2,RARG,FOXA1,CSGALNACT1,DYRK1B,AXIN2,WNT7A,EBF2,COL2A1,WNT2B,UNCX,WNT5A,AACS,FGF2,COCH,DDRGK1,LRP5,FGFR1,MSX1,MATN2,PTH1R,BARX2,IMPAD1,PAXIP1,ROR2,FGFR3,HMGA2,RSPO2,SNORC,BMPR1A,ID4,HOXA11,PDGFB,BBS2,OSR2,SULF2,SFRP2,MSX2,SIX2,BMP8A,CCN2,NOG,DLX2,FOXC2,FOXD1,FGF18,SNAI1,MATN3,HOXC4,TGFBI,BMP8B,CASR,BMP4,UMODL1,NPPC,PPARGC1A,SMAD1,ITGB8,COL12A1,VWA1,PPARD,SERP…
GO:0044304	CC	main axon	5.75244e-07	-14.3685	68	29	0.00899783	3223	18985	KCNA1,DNM1,SCN1B,DLG2,KCNQ3,ANK3,TIAM1,ADORA1,ANKRD9,SCN8A,SPOCK1,KIF13B,DLG4,EPB41L3,NAV1,MAP1A,SPTBN4,MAP1B,NRCAM,TUBB4A,ANK2,KCNA2,DAGLA,APBB1,ANK1,BIN1,APP,MYO1D,MAP2
GO:0048663	BP	neuron fate commitment	6.27409e-07	-14.2817	64	28	0.00901481	3106	18054	NOTCH3,SOX1,NKX6-1,SIX1,BCL11B,DLX2,ISL2,JAG2,FOXN4,HOXC10,EVX1,OLIG2,DMRT3,POU3F2,FOXA1,LBX1,NRG1,GBX1,ZNF521,DLL1,DLL4,EPOP,SHH,BMP4,GSX2,NKX2-2,GATA2,GLI3
GO:0031589	BP	cell-substrate adhesion	7.34691e-07	-14.1238	181	58	0.0186735	3106	18054	TIAM1,SORBS3,BCR,BVES,FGFRL1,EPHA1,HSPG2,AKIP1,LYPD5,TMEM8B,ITGA11,ITGA6,PARVG,NID2,COL13A1,PECAM1,EFNA1,ITGA2B,LYPD3,AJUBA,SORBS1,FERMT2,ITGB8,FN1,ADAM15,PPARD,ITGA2,LAMA5,SNED1,DDR1,EPHB3,BCAM,CORO2B,SRCIN1,NID1,NRP1,GAS6,NTN4,FZD7,MADCAM1,MERTK,LAMC1,PARVB,ITGB3,ITGB1BP1,TYRO3,TSC1,PRKX,ITGA3,ITGB5,SMAD6,ABL1,EPDR1,MICALL2,ITGB4,PTPRK,CCN2,FZD4
GO:0017147	MF	Wnt-protein binding	8.75976e-07	-13.9479	37	20	0.00639182	3129	17306	MET,FZD8,SFRP2,ROR2,MERTK,TYRO3,FZD2,FZD7,FZD1,SFRP4,APCDD1,PORCN,FZD6,EGF,TRABD2A,LRP5,FZD5,FZD3,ROR1,FZD4
GO:0099173	BP	postsynapse organization	1.04395e-06	-13.7725	87	34	0.0109466	3106	18054	DLG3,NRP1,CHRNB1,TANC1,DVL1,DOCK10,DLG2,NEFL,NRXN2,LRP4,WNT7A,WNT5A,ITGA3,SYNGAP1,PICK1,INSR,FYN,OPHN1,INA,EPHB2,GPHN,DLG4,CDH2,DBN1,ACTG1,MYH10,ZNF365,NLGN1,SPTBN2,ARHGAP39,NOS1AP,ITPKA,EPHB3,PRNP
GO:0043583	BP	ear development	1.08139e-06	-13.7373	217	66	0.0212492	3106	18054	TWIST1,MAF,PAX2,FGFR2,CELSR1,ROR1,SPRY2,DVL1,GLI3,NEUROD1,SIX1,EPHA4,NOG,SIX2,DLX5,NKX3-2,CDH23,ABR,OSR2,LRIG1,CCNA2,DLX6,BCR,KCNQ4,SDC4,EPHB2,BMP4,IFT88,VANGL2,PTK7,SLC26A5,FZD3,FZD6,MCOLN3,DLL1,FZD2,NAGLU,ALDH1A3,NTN1,WNT5A,COL2A1,GSC,ANP32B,IFT20,ATP8A2,ATP8B1,HMX3,GJB6,GJB2,MSX1,HMX2,WHRN,FGFR1,SOBP,SHH,TMIE,GSDME,GATA2,SLC25A27,TIFAB,FGF20,ROR2,DDR1,TBX1,JAG2,SIX4
GO:0010464	BP	regulation of mesenchymal cell proliferation	1.23356e-06	-13.6056	33	18	0.00579524	3106	18054	SIX1,WNT5A,SMO,VEGFA,MYC,TBX1,IRS2,FOXF1,SHOX2,BMPR1A,FGFR2,FGFR1,SHH,LRP5,BMP4,WNT11,CHRD,CTNNBIP1
GO:0043954	BP	cellular component maintenance	1.58723e-06	-13.3535	46	22	0.00708307	3106	18054	DLG3,WHRN,CTBP2,ADGRB3,INAVA,CHCHD10,TANC1,DLG2,ERC2,SYNGAP1,ITGA3,PLEKHA7,CSF1R,PKP2,OPHN1,C1QL1,PRNP,ITPKA,INSR,FYN,CAMSAP3,PICK1
GO:0050772	BP	positive regulation of axonogenesis	1.78088e-06	-13.2384	85	33	0.0106246	3106	18054	PLXNB2,CXCL12,VEGFA,DISC1,CDH4,STK25,LRP1,SHTN1,FN1,NTRK2,PLXNA3,TIAM1,CYFIP1,PLXNB1,DBN1,MACF1,MAP1B,NTN1,LIMK1,MAP3K13,PLXNA1,NRP1,PLXNA2,MAP2K1,CRABP2,SHOX2,MAP6,PLXND1,LPAR3,BDNF,WNT3,NEFL,MEGF8
GO:0061351	BP	neural precursor cell proliferation	1.80276e-06	-13.2262	74	30	0.00965873	3106	18054	RORA,POU3F2,FZD3,IFT20,FZD6,MELK,KCNA1,WNT7A,KCTD13,DISC1,DAGLA,PLXNB2,DCT,TRNP1,KIF1A,TEAD3,DBN1,GLI3,EMX2,ARTN,ARX,HHIP,FGFR1,FGFR2,SHH,ID4,NUMBL,RPGRIP1,DOCK7,IGF2BP1
GO:0003279	BP	cardiac septum development	1.88302e-06	-13.1826	112	40	0.0128783	3106	18054	BMPR1A,XIRP2,TGFBR3,FGFR2,NRP1,SALL4,LTBP1,SAV1,SNX17,ENG,FZD2,PLXND1,NOG,ZFPM2,ANK2,WNT5A,HEG1,MIR17HG,MSX2,SMAD6,FZD1,TAB1,LUZP1,DNAH11,FGFRL1,DHRS3,PCSK5,SOX4,TBX20,VANGL2,WNT11,BMP4,MYH10,CRELD1,SMO,CCN1,PTK7,MATR3,HEYL,TBX1
GO:0002053	BP	positive regulation of mesenchymal cell proliferation	1.9005e-06	-13.1734	25	15	0.00482936	3106	18054	SIX1,WNT5A,VEGFA,BMPR1A,LRP5,FGFR1,SHH,FGFR2,SMO,SHOX2,TBX1,MYC,FOXF1,IRS2,CHRD
GO:0072073	BP	kidney epithelium development	1.9444e-06	-13.1506	128	44	0.0141661	3106	18054	SMAD1,SDC4,PGF,FMN1,EFNB2,SHH,FGFR1,WNT11,KANK2,BMP4,SMAD3,IRX3,FGF2,CTNNBIP1,PECAM1,KLF15,SMO,IRX2,RET,LAMA5,HEYL,GDF11,EPHA7,DLL1,HOXA11,FGFR2,PAX2,WNT7B,KIF26B,GLI3,SIX1,FOXD1,CITED1,NOG,FOXC2,SPRY1,EPHA4,MYC,SIX2,WT1,SDC1,SMAD6,KLHL3,HNF1B
GO:0003206	BP	cardiac chamber morphogenesis	2.4643e-06	-12.9136	129	44	0.0141661	3106	18054	NRP1,PPP1R13L,NRG1,TGFBR3,FGFR2,BMPR1A,SHOX2,RXRA,FZD2,ENG,SAV1,WNT5A,MIR17HG,HEG1,CPE,OVOL2,ZFPM2,MESP1,ADAMTS1,FOXC2,NOG,SMARCD3,FZD1,PKP2,FOXF1,SFRP2,SMAD6,MSX2,FGFRL1,DNAH11,RBP4,DLL4,FOXH1,WNT11,BMP4,TBX20,VANGL2,SOX4,DHRS3,DSP,CCN1,SMO,TBX1,HEYL
GO:0009952	BP	anterior/posterior pattern specification	2.94019e-06	-12.737	214	64	0.0206053	3106	18054	SOX17,EN1,PCSK5,PLD6,NKX3-1,FZD5,MSX1,RING1,LRP5,SHH,ROR2,TBX1,SKI,TIFAB,NR2F2,TBX18,HOXB7,ZBTB16,MIB1,WNT3,RARG,BARX1,ZIC3,DLL1,HNF1B,SSBP3,CDON,WNT5A,AXIN2,MESP1,BMP4,EMX2,SMAD3,FOXH1,HOXC4,CTNNBIP1,VANGL2,CELSR2,HEYL,HOXC10,KDM2B,GDF11,HES7,SMO,POGLUT1,HOXA6,PCDH8,GLI3,PLXNA2,YY1,MEOX1,NRARP,HOXA11,BMPR1A,CELSR1,SIX2,HOXD9,WT1,MSX2,FOXF1,SFRP2,NEUROD1,NOG,FOXC2
GO:0035136	BP	forelimb morphogenesis	3.20494e-06	-12.6508	41	20	0.00643915	3106	18054	WNT7A,WNT9A,RSPO2,SALL3,ALX3,MSX2,OSR2,HOXD9,RNF165,HOXA11,SHOX2,CRABP2,MSX1,TWIST1,FMN1,SHH,CACNA1C,WNT3,EN1,ZBTB16
GO:0048863	BP	stem cell differentiation	3.35443e-06	-12.6052	155	50	0.0160979	3106	18054	SOX18,SHC4,SETD6,ESR1,SEMA3F,PDX1,HMGA2,SMO,RET,TBX1,LAMA5,FN1,EOMES,KIT,EFNB1,SHH,FBXL17,GPM6A,MSX1,SOX17,ACE,OVOL2,FOXC2,SOX21,GSC,WNT7A,FZD1,SEMA5B,HNF1B,SEMA4G,MSX2,MEOX1,FOXA1,NRP1,WNT10A,NRG1,FGFR2,TAPT1,NELFB,SEMA4F,KITLG,BMPR1A,PAX2,TWIST1,EPOP,EDNRB,SP7,ERBB4,PDCD6,WNT3
GO:0021517	BP	ventral spinal cord development	3.8685e-06	-12.4626	48	22	0.00708307	3106	18054	GBX1,LBX1,MDGA2,SHH,DLL4,ZC4H2,GATA2,NKX2-2,TBX20,SOX4,GLI3,GDPD5,SOX1,NKX6-1,ISL2,LHX4,FOXN4,HOXC10,DMRT3,OLIG2,PHOX2A,EVX1
GO:0001764	BP	neuron migration	4.01827e-06	-12.4247	119	41	0.0132003	3106	18054	FYN,DNER,MARK1,NTN1,MAP1B,CELSR3,SOX1,ITGA3,DRGX,NR2F2,AUTS2,NRP1,GAS6,ACAP3,TWIST1,CELSR1,DDIT4,FZD3,NRCAM,CDK5R2,NKX6-1,CXCL12,DISC1,VEGFA,BARHL2,VAX1,NAV1,MYH10,GATA2,MDGA1,ARX,LRP12,TBX20,SPOCK1,NDNF,NR4A2,MATN2,NTRK2,CDK5R1,GPM6A,FGFR1
GO:0048762	BP	mesenchymal cell differentiation	4.12123e-06	-12.3994	156	50	0.0160979	3106	18054	SHH,FGFR1,FBXL17,MSX1,EFNB1,LOXL3,WNT11,BMP4,SEMA3F,SMO,HMGA2,EFNA1,FN1,ADAM15,EOMES,HAS2,RET,TBX1,LAMA5,HEYL,KITLG,TAPT1,SEMA4F,FGFR2,TGFBR3,PAX2,BMPR1A,TWIST1,LOXL2,NRP1,NRG1,WNT10A,ERBB4,ENG,PDCD6,AMER1,EDNRB,SPRY1,FOXC2,NOG,SNAI1,GSC,DLG5,WNT5A,OVOL2,SEMA5B,ACVRL1,SEMA4G,MSX2,SIX2
GO:0048839	BP	inner ear development	4.16482e-06	-12.3888	190	58	0.0186735	3106	18054	DLX6,GJB2,LRIG1,GJB6,CCNA2,BCR,KCNQ4,SDC4,HMX2,WHRN,EPHB2,SOBP,FGFR1,SHH,GSDME,BMP4,TMIE,GATA2,SLC25A27,IFT88,VANGL2,TIFAB,PTK7,FGF20,SLC26A5,FZD3,ROR2,FZD6,JAG2,TBX1,MCOLN3,SIX4,MAF,DLL1,PAX2,CELSR1,FGFR2,FZD2,ROR1,NAGLU,SPRY2,DVL1,GLI3,NEUROD1,ALDH1A3,NTN1,SIX1,WNT5A,COL2A1,EPHA4,IFT20,ANP32B,ATP8A2,ATP8B1,DLX5,CDH23,ABR,HMX3
GO:0034446	BP	substrate adhesion-dependent cell spreading	4.96031e-06	-12.214	52	23	0.00740502	3106	18054	ITGB3,TYRO3,EFNA1,PARVG,PARVB,LAMA5,EPHB3,FZD4,MICALL2,ABL1,FERMT2,FN1,NRP1,BVES,FGFRL1,NTN4,SRCIN1,EPHA1,HSPG2,AKIP1,FZD7,LAMC1,MERTK
GO:0042476	BP	odontogenesis	5.09907e-06	-12.1865	120	41	0.0132003	3106	18054	BCOR,SDC1,ITGB4,OSR2,MSX2,PAM,NECTIN1,CTNNA1,AXIN2,DLX2,LRP4,GNAO1,GLI3,CNNM4,SLC24A4,WNT10A,FGFR2,TNFSF11,BMPR1A,TWIST1,CA2,TBX1,JAG2,LAMA5,ADAMTS5,FAM20C,LHX8,ROGDI,SCN5A,HTRA1,BCL11B,NKX2-3,SMO,ITGA6,BMP4,AQP3,PPARA,SERPINE1,NFIC,SHH,MSX1
GO:0048593	BP	camera-type eye morphogenesis	5.11204e-06	-12.1839	112	39	0.0125563	3106	18054	SOX1,WNT5A,CDON,NECTIN1,SDK1,THRB,ALDH1A3,RS1,WNT2B,FOXN4,ATP8A2,IRX5,YY1,PAX2,DLL1,TWIST1,GLI3,BAK1,ABI2,ROM1,ARL6,WNT9A,VEGFA,NECTIN3,PTPRM,COL8A2,SKI,BCAR3,KDM2B,FJX1,GDF11,PITX3,MEGF11,FZD5,RBP4,EPHB2,LRP5,RING1,BMP4
GO:0001667	BP	ameboidal-type cell migration	5.38648e-06	-12.1316	170	53	0.0170637	3106	18054	SEMA5B,SEMA4G,ABL1,MIXL1,PKN3,AMOTL1,PRKX,WNT5A,ADGRA2,SGPL1,OVOL2,MESP1,EDNRB,PLXND1,NANOS1,MIA3,SCARB1,MEGF8,ERBB4,STARD13,LOXL2,NRP1,DPP4,KANK1,GPX1,KITLG,SEMA4F,CENPV,CYP1B1,TWIST1,AMOT,LAMA5,TBX1,RET,PPARD,FN1,KIT,PAXIP1,SOX18,PECAM1,VEGFA,SEMA3F,SMO,SOX17,WNT11,KANK2,FGF2,PIK3R3,EFNB1,PDXDC1,TMEM201,EFNB2,SHH
GO:0035113	BP	embryonic appendage morphogenesis	6.35838e-06	-11.9657	125	42	0.0135222	3106	18054	LRP4,WNT7A,NOG,MAP3K20,TRAF3IP1,WNT5A,MSX2,LMBR1,DLX5,OSR2,SFRP2,HOXD9,TWIST1,SHOX2,HOXA11,CRABP2,BMPR1A,CACNA1C,SP8,RARG,SALL4,WNT3,MEGF8,GLI3,ZBTB16,WNT9A,RSPO2,ALX3,SKI,IMPAD1,ROR2,FBN2,HOXC10,FZD6,MSX1,SHH,FGFR1,AFF3,DLX6,EN1,CYP26B1,BMP4
GO:0007498	BP	mesoderm development	6.35838e-06	-11.9657	125	42	0.0135222	3106	18054	FOXF1,ITGB4,SIX2,SNAI1,FOXC2,NOG,MESP1,YAP1,ITGB3,ZFPM2,SSBP3,WNT5A,ITGA3,TLX2,WNT3,CHRD,EXT2,HOXA11,BMPR1A,PAX2,FGFR2,LHX2,GDF11,EOMES,HES7,ITGA2,TBX1,SMO,POGLUT1,HMGA2,VEGFA,MEST,TBX20,BMP4,WNT11,KLF4,FOXH1,IRX3,SMAD3,FGFR1,SHH,SMAD1
GO:0030326	BP	embryonic limb morphogenesis	6.35838e-06	-11.9657	125	42	0.0135222	3106	18054	RSPO2,WNT9A,ROR2,FZD6,FBN2,HOXC10,ALX3,IMPAD1,SKI,DLX6,AFF3,MSX1,FGFR1,SHH,BMP4,CYP26B1,EN1,MAP3K20,TRAF3IP1,WNT5A,LRP4,WNT7A,NOG,HOXD9,DLX5,MSX2,LMBR1,SFRP2,OSR2,RARG,SALL4,SHOX2,CRABP2,HOXA11,TWIST1,CACNA1C,BMPR1A,SP8,ZBTB16,WNT3,MEGF8,GLI3
GO:0010770	BP	positive regulation of cell morphogenesis involved in differentiation	6.42481e-06	-11.9553	154	49	0.0157759	3106	18054	PLXNB1,CYFIP1,DBN1,MACF1,NTRK2,TIAM1,PLXNA3,BAIAP2,LIMS2,STK25,CDH4,LRP1,HAS2,RAC3,FN1,SHTN1,DOCK1,ITPKA,PLXNB2,CARMIL1,VEGFA,DISC1,CXCL12,LPAR3,PLXND1,MEGF8,WNT3,BDNF,LRP8,NEFL,PLXNA2,CSPG5,NRP1,DMTN,OBSL1,MAP2K1,MAP6,CRABP2,SHOX2,FBXO31,PLXNA1,MAP3K13,ABL1,MAP1B,FLNA,NTN1,EPHA4,LIMK1,CUX2
GO:0060349	BP	bone morphogenesis	6.52292e-06	-11.9402	113	39	0.0125563	3106	18054	BMP4,DHRS3,CYP26B1,MATN2,MSX1,NPPC,COCH,LRP5,MMP14,VWA1,COL12A1,SKI,HAS2,IMPAD1,COL13A1,TIFAB,FGFR3,SERPINH1,GLI3,MEGF8,RARG,TWIST1,SHOX2,HOXA11,SFRP4,FGFR2,INPPL1,RAB23,CSGALNACT1,MSX2,DLX5,OSR2,SFRP2,LTBP3,MATN3,COL2A1,FGF18,SP5,AXIN2
GO:0048592	BP	eye morphogenesis	6.92866e-06	-11.8798	146	47	0.015132	3106	18054	SKI,BCAR3,KDM2B,FJX1,GDF11,FOXL2,FBN2,PTPRM,NECTIN3,COL8A2,VAX2,WNT9A,VEGFA,ARL6,ROM1,BMP4,LRP5,EPHB2,RING1,RPGRIP1,FZD5,MEGF11,PITX3,NTRK2,RBP4,NKD1,FOXN4,ATP8A2,IRX5,WNT2B,WNT5A,SOX1,CDON,SDK1,THRB,NECTIN1,ALDH1A3,RS1,BAK1,GLI3,ABI2,NAGLU,PAX2,DLL1,TWIST1,YY1,RARG
GO:0035148	BP	tube formation	6.92866e-06	-11.8798	146	47	0.015132	3106	18054	LUZP1,SDC4,DAB2IP,SHH,ATOH8,BMP4,IRX3,TSC2,VANGL2,TRIM71,SOX4,PTK7,PLXNB2,PRKACB,VEGFA,IRX2,FZD3,FZD6,RET,KDM2B,SKI,MTHFD1L,RARG,LHX2,SALL4,TWIST1,CELSR1,FGFR2,PAX2,FZD2,MIB1,GDF7,DVL1,APAF1,ITGB1BP1,OVOL2,WNT5A,TSC1,SIX1,MTHFD1,PRICKLE1,NOG,FZD1,ABL1,CC2D2A,SFRP2,HNF1B
GO:0072089	BP	stem cell proliferation	7.34279e-06	-11.8218	53	23	0.00740502	3106	18054	SFRP2,SIX2,WNT2B,KCNA1,DAGLA,WNT5A,DCT,PLXNB2,ETV6,WNT3,TEAD3,FGF2,TRIM71,WNT7B,ARTN,HHIP,FGFR2,SHH,ID4,FGFR1,BABAM1,NUMBL,DOCK7
GO:0001838	BP	embryonic epithelial tube formation	8.10793e-06	-11.7227	122	41	0.0132003	3106	18054	WNT5A,TSC1,SIX1,OVOL2,NOG,PRICKLE1,MTHFD1,FZD1,CC2D2A,SFRP2,HNF1B,ABL1,SALL4,RARG,MTHFD1L,LHX2,CELSR1,PAX2,TWIST1,MIB1,FZD2,APAF1,GDF7,DVL1,PLXNB2,PTK7,PRKACB,FZD6,RET,IRX2,FZD3,SKI,KDM2B,SDC4,LUZP1,IRX3,BMP4,VANGL2,SOX4,TRIM71,TSC2
GO:0060541	BP	respiratory system development	8.47613e-06	-11.6783	194	58	0.0186735	3106	18054	HHIP,SHH,FGFR1,TAB1,RBP4,FGFRL1,VANGL2,BMP4,WNT11,TNS3,LOXL3,ASS1,VEGFA,RSPO2,PTK7,SIX4,SKI,ERRFI1,SIM2,MMP14,EDN2,LAMA5,ZIC3,MAP2K1,FGFR2,HSPB11,CELSR1,BMPR1A,RARG,FOXA1,GNG8,SAV1,SPRY2,GLI3,WNT7B,HS6ST1,DLG5,FGF18,YAP1,NOG,SPRY1,ALDH1A3,ZFPM2,LTBP3,HEG1,WNT5A,ITGA3,MIR17HG,GLI1,ADAMTS2,THRB,SIX1,DLX5,FSTL3,FOXF1,EIF4EBP1,CCN2,WT1
GO:0018108	BP	peptidyl-tyrosine phosphorylation	8.50532e-06	-11.6748	147	47	0.015132	3106	18054	MAP2K7,EPHA1,EPHB2,FGFR1,WEE1,NTRK2,TESK1,EPHA7,KIT,NTRK1,RET,DDR1,EPHB3,ROR2,CSF1R,FGFR3,MAP2K3,EGF,ERBB4,MERTK,ABI2,ROR1,IL15,FGFR2,CLK3,MAP2K1,DYRK2,PDGFB,TTBK1,SCYL1,MET,EPHB6,DYRK3,ERBB3,ABL1,FYN,INSR,TNK1,MELK,FLT1,DYRK1B,FES,EPHA4,FGFR4,EPHA6,TYRO3,PRLR
GO:0034330	BP	cell junction organization	9.1854e-06	-11.5979	212	62	0.0199614	3106	18054	BCR,CDH2,ZNF703,GJB2,CD151,NUMBL,WHRN,TJP1,WNT11,ITGA6,SMAD3,MARVELD2,ACTG1,NECTIN2,PARD6B,DSP,PECAM1,FSCN1,CSF1R,CDH4,PRKCA,NECTIN3,LIMS2,LAMA5,ITGA2,FERMT2,AJUBA,ANG,SORBS1,FN1,CDH24,PLEC,OCLN,XIRP2,CORO2B,EPB41L3,GJD3,FLNC,DST,PIP5K1C,INAVA,LAMC1,FLNA,PLEKHA7,HEG1,SDK1,ANK2,NECTIN1,DLG5,PATJ,CADM1,CADM2,CTNNA1,PTPRK,PKP2,OPHN1,JUP,CXADR,CAMSAP3,MICALL2,ITGB4,PARD6G
GO:0001707	BP	mesoderm formation	9.27402e-06	-11.5883	68	27	0.00869285	3106	18054	SNAI1,HMGA2,MESP1,NOG,FOXC2,ITGB3,TLX2,ITGA3,WNT5A,ITGB4,FOXF1,EOMES,SIX2,ITGA2,HOXA11,EXT2,FGFR2,PAX2,BMPR1A,SMAD1,CHRD,WNT3,TBX20,WNT11,KLF4,BMP4,SMAD3
GO:0060560	BP	developmental growth involved in morphogenesis	1.04768e-05	-11.4663	115	39	0.0125563	3106	18054	SEMA3F,ESR1,APP,PTK7,EMX1,DDR1,FMN1,PLXNA3,TIAM1,SHH,HSP90AA1,VANGL2,WNT11,CYFIP1,BMP4,AREG,SPRY1,YAP1,MESP1,MAP1B,ALCAM,FLRT1,WNT5A,ABL1,HNF1B,SEMA5B,SFRP2,SLIT1,PLXNA1,FGFR2,LHX2,NRP1,RARG,SPRY2,BDNF,AUTS2,DVL1,KIF26B,WNT7B
GO:0021915	BP	neural tube development	1.1591e-05	-11.3653	157	49	0.0157759	3106	18054	APAF1,GLI3,GDF7,DVL1,CHRD,MIB1,FZD2,CELSR1,PAX2,TWIST1,SALL4,TCF7,PLXNA2,MTHFD1L,RARG,FOXA1,LHX2,SFRP2,CC2D2A,ABL1,FZD1,NOG,PRICKLE1,GSC,MTHFD1,WNT5A,TSC1,TRAF3IP1,SSBP3,OVOL2,VANGL2,TRIM71,SOX4,TSC2,EN1,BMP4,SOX17,SHH,SDC4,PHGDH,LUZP1,SKI,KDM2B,FZD6,FZD3,PRKACB,SMO,PLXNB2,PTK7
GO:0051216	BP	cartilage development	1.19992e-05	-11.3307	170	52	0.0167418	3106	18054	ZBTB16,WNT7B,SNORC,BBS2,RARG,BMPR1A,TAPT1,SHOX2,HOXA11,SIX2,CSGALNACT1,BMP8A,CCN2,SULF2,OSR2,SFRP2,MSX2,UNCX,MATN3,WNT5A,NOG,DLX2,AXIN2,WNT7A,COL2A1,FGF18,WNT2B,SNAI1,TGFBI,BMP8B,BMP4,FGF2,HOXC4,PTH1R,MATN2,SMAD1,BARX2,NPPC,COCH,DDRGK1,FGFR1,MSX1,VWA1,ROR2,COL12A1,ITGB8,IMPAD1,CCN1,RSPO2,SERPINH1,FGFR3,HMGA2
GO:0007626	BP	locomotory behavior	1.27177e-05	-11.2725	192	57	0.0183516	3106	18054	DMBX1,PPT1,DMRT3,CDH23,FZD4,HOXD9,C1QL1,APBA2,GAD1,ABAT,EPHA4,TSC1,ALDH1A3,HTR2C,KCNJ10,GPR88,PRKN,NAGLU,MTA1,GNAO1,APBA1,QRFP,CELSR1,SEZ6L,HPRT1,SNCA,GBX1,CRHR1,DPP4,NRG1,MCOLN3,USP2,SNAP25,TRH,APP,RASD2,PRKCE,ANKH,CXCL12,NPC1,CTNS,EN1,HEXB,GAA,ZDHHC8,SOBP,NAV2,CSTB,DLG4,SPTBN4,OXR1,NR4A2,ADCY5,PITX3,PPP1R1B,TMOD1,SLURP1
GO:0001708	BP	cell fate specification	1.27243e-05	-11.272	88	32	0.0103026	3106	18054	FOXA1,NRP1,HOXA11,DLL1,PAX2,TBX15,GSX2,TBX18,NKX2-2,GLI3,SIX1,SOX1,CDON,GSC,ISL2,SIX2,EVX1,DMRT3,POU3F2,HNF1B,LBX1,TBX21,SHH,SOX17,TBX20,SOX18,NKX6-1,SMO,HOXC10,TBX1,OLIG2,EOMES
GO:0006029	BP	proteoglycan metabolic process	1.30726e-05	-11.245	92	33	0.0106246	3106	18054	CHSY3,SGSH,COL2A1,FAM20B,CHST8,CSGALNACT1,CHST3,HS3ST4,HS6ST3,UST,SULF2,XYLT2,CSPG5,EXT2,GPC1,CHST13,SPOCK2,HS6ST1,B3GAT2,HS3ST3A1,CHST14,CHST10,HEXA,PPARD,SPOCK3,IDUA,IMPAD1,CHPF,NDNF,EXTL3,B4GALT7,HEXB,VANGL2
GO:0001841	BP	neural tube formation	1.35043e-05	-11.2125	104	36	0.0115905	3106	18054	WNT5A,TSC1,OVOL2,NOG,PRICKLE1,MTHFD1,FZD1,CC2D2A,SFRP2,ABL1,SALL4,RARG,MTHFD1L,LHX2,CELSR1,PAX2,TWIST1,MIB1,FZD2,APAF1,DVL1,GDF7,PLXNB2,PTK7,PRKACB,FZD6,FZD3,SKI,KDM2B,SDC4,LUZP1,BMP4,VANGL2,SOX4,TRIM71,TSC2
GO:0048639	BP	positive regulation of developmental growth	1.44024e-05	-11.1481	184	55	0.0177077	3106	18054	MAP1B,ZFPM2,NTN1,GLI1,MIR17HG,LIMK1,YAP1,MAP3K13,ATP8A2,WT1,CPNE6,INSR,POU3F2,HSF1,BBS2,NRP1,PLCB1,CRABP2,DLL1,BMPR1A,TGFBR3,FGFR2,SH3PXD2B,IL7,LPAR3,PRKN,BDNF,WNT3,YBX3,MEGF8,SYT17,NEDD4L,ERBB4,PLS1,SMO,CXCL12,VEGFA,DISC1,CDH4,LRP1,PPARD,AGRN,SHTN1,FN1,PIN1,SPTBN4,FGFR1,SMURF1,CYFIP1,ARX,RIMS2,DBN1,MACF1,TBX20,FGF2
GO:0008589	BP	regulation of smoothened signaling pathway	1.47574e-05	-11.1238	77	29	0.00933677	3106	18054	FOXA1,FGFR2,SHH,KCTD6,HHIP,ULK3,FBXL17,SHOX2,GLIS2,SERPINE2,MEGF8,GLI3,MOSMO,KCTD11,GLI1,SALL3,ARL6,SCUBE3,ENPP1,TRAF3IP1,WNT9A,CTNNA1,SMO,DLG5,PRKACB,GAS1,KIF7,RORA,SCUBE1
GO:0018212	BP	peptidyl-tyrosine modification	1.5443e-05	-11.0784	150	47	0.015132	3106	18054	NTRK2,EPHB2,FGFR1,WEE1,EPHA1,MAP2K7,MAP2K3,EGF,FGFR3,CSF1R,ROR2,RET,NTRK1,DDR1,EPHB3,KIT,EPHA7,TESK1,MET,DYRK2,PDGFB,TTBK1,SCYL1,MAP2K1,FGFR2,CLK3,IL15,ROR1,ABI2,ERBB4,MERTK,TYRO3,PRLR,EPHA6,FGFR4,EPHA4,FLT1,DYRK1B,FES,MELK,FYN,ABL1,TNK1,INSR,EPHB6,DYRK3,ERBB3
GO:0060021	BP	roof of mouth development	1.66194e-05	-11.0049	89	32	0.0103026	3106	18054	EPHB2,SHH,MSX1,BNC2,DLX6,DHRS3,LOXL3,WNT11,VAX1,PLEKHA1,SKI,GDF11,PRDM16,JAG2,TBX1,EPHB3,TGFBR3,BMPR1A,TWIST1,GLI3,FZD2,SNAI1,COL2A1,WNT7A,WNT5A,LRRC32,SGPL1,OSR2,DLX5,BCOR,FZD1,ANP32B
GO:0042472	BP	inner ear morphogenesis	1.71425e-05	-10.9739	97	34	0.0109466	3106	18054	FZD2,SPRY2,DVL1,PAX2,FGFR2,CELSR1,ATP8A2,DLX5,ABR,HMX3,NTN1,ALDH1A3,SIX1,WNT5A,COL2A1,TMIE,GATA2,VANGL2,DLX6,LRIG1,BCR,KCNQ4,HMX2,WHRN,SOBP,EPHB2,FGFR1,FZD3,ROR2,FZD6,TBX1,SIX4,TIFAB,PTK7
GO:0048332	BP	mesoderm morphogenesis	1.73858e-05	-10.9599	70	27	0.00869285	3106	18054	FOXF1,ITGB4,EOMES,SIX2,ITGA2,SNAI1,HMGA2,MESP1,FOXC2,NOG,ITGB3,WNT5A,ITGA3,TLX2,CHRD,WNT3,TBX20,WNT11,KLF4,BMP4,SMAD3,HOXA11,EXT2,FGFR2,PAX2,BMPR1A,SMAD1
GO:0001570	BP	vasculogenesis	1.73858e-05	-10.9599	70	27	0.00869285	3106	18054	ENG,TBX20,WNT7B,SOX17,ACKR3,EGFL7,ZMIZ1,TGFBR3,SHH,NTRK2,PAXIP1,HAS2,ITGB8,FOXF1,CAV1,AMOT,FZD4,WT1,WNT7A,SMO,VEGFA,YAP1,CITED1,SGPL1,ZFPM2,SOX18,HEG1
GO:0043194	CC	axon initial segment	1.83393e-05	-10.9065	20	12	0.00372324	3223	18985	NRCAM,ANK2,KCNQ3,ANK3,ANKRD9,SCN8A,NAV1,BIN1,ANK1,MAP2,SPTBN4,MAP1A
GO:0072175	BP	epithelial tube formation	1.89105e-05	-10.8758	130	42	0.0135222	3106	18054	FZD2,MIB1,DVL1,GDF7,APAF1,LHX2,RARG,MTHFD1L,SALL4,TWIST1,PAX2,FGFR2,CELSR1,FZD1,ABL1,HNF1B,SFRP2,CC2D2A,OVOL2,TSC1,SIX1,WNT5A,MTHFD1,PRICKLE1,NOG,BMP4,IRX3,TSC2,SOX4,TRIM71,VANGL2,LUZP1,SDC4,FZD3,IRX2,FZD6,RET,KDM2B,SKI,PTK7,PLXNB2,PRKACB
GO:0048706	BP	embryonic skeletal system development	1.95363e-05	-10.8432	126	41	0.0132003	3106	18054	WNT9A,ALX3,SIX4,MMP14,TBX1,SHH,RBP4,HOXC4,WDR60,SLC39A3,PCSK5,BMP4,WNT11,SMAD3,COL2A1,MTHFD1,GSC,FOXC2,DLX2,NOG,SIX1,WNT5A,NKX3-2,OSR2,SULF2,IRX5,SIX2,HOXD9,KIAA1217,TWIST1,SHOX2,HOXA11,TAPT1,FGFR2,TBX15,MTHFD1L,MEGF8,GLI3,DMRT2,HOXB7,HOXA6
GO:0030902	BP	hindbrain development	1.96401e-05	-10.8379	147	46	0.01481	3106	18054	SDF4,NAGLU,NANOS1,GSX2,SEZ6L,MAP2K1,DLL1,PLXNA2,NEUROD2,GBX1,HNF1B,RORA,ABL1,FZD4,OPHN1,NOG,ABAT,WNT7A,GLI1,NEUROD1,FLNA,RBFOX2,EN1,TRNP1,SERPINE2,MYH10,CKB,GATA2,CBLN1,WHRN,SHH,PTPRS,CDK5R1,PPARGC1A,SMAD1,NEUROG3,PHOX2A,KDM2B,TTBK2,SMO,ZNF365,ATIC,SCN5A,LPAR1,CDK5R2,SPTBN2
GO:0042475	BP	odontogenesis of dentin-containing tooth	2.04939e-05	-10.7954	82	30	0.00965873	3106	18054	BMPR1A,SHH,MSX1,SLC24A4,CNNM4,GLI3,NFIC,SERPINE1,PPARA,ITGA6,BMP4,GNAO1,DLX2,CTNNA1,HTRA1,BCL11B,LRP4,SMO,NKX2-3,NECTIN1,SCN5A,FAM20C,ITGB4,MSX2,ROGDI,LHX8,LAMA5,CA2,TBX1,JAG2
GO:0061387	BP	regulation of extent of cell growth	2.14749e-05	-10.7486	110	37	0.0119124	3106	18054	LPAR3,RTN4R,WNT3,BDNF,MEGF8,NRP1,CRABP2,SEMA4F,MAP3K13,ABL1,SEMA4G,SEMA5B,MAP1B,NTN1,WNT5A,LIMK1,DRAXIN,BARHL2,CYFIP1,DBN1,MACF1,PLXNA3,PTPRS,CDK5R1,NRCAM,MAP2,CDH4,LRP1,SHTN1,DPYSL2,EPHA7,FN1,NKX6-1,CXCL12,VEGFA,SEMA3F,DISC1
GO:0001823	BP	mesonephros development	2.15737e-05	-10.744	90	32	0.0103026	3106	18054	SDC1,WT1,MYC,HNF1B,OSR2,SMAD6,SIX1,NOG,SPRY1,FOXC2,CITED1,FOXD1,ZBTB16,KIF26B,GLI3,PAX2,FGFR2,HOXA11,LAMA5,RET,GDF11,SMAD3,WNT11,BMP4,CTNNBIP1,FGF2,PGF,SDC4,SMAD1,FGFR1,SHH,FMN1
GO:0051963	BP	regulation of synapse assembly	2.17523e-05	-10.7358	106	36	0.0115905	3106	18054	FLRT1,WNT5A,SIX1,NECTIN1,NTN1,CUX2,DLG5,WNT7A,SLIT1,FZD1,ADGRB2,LRFN4,SLITRK5,SNCA,GPC4,ASIC2,BDNF,NLGN1,APP,CLSTN2,AGRN,NTRK1,EPHB3,ADGRB1,EPHA7,SIX4,NTRK2,EPHB2,CBLN2,CBLN1,TPBG,ADGRL1,PTPRS,LRTM2,MDGA1,ADGRB3
GO:0043393	BP	regulation of protein binding	2.37514e-05	-10.6479	218	62	0.0199614	3106	18054	PPARA,STUB1,CTNNBIP1,BMP4,TRAF4,PEX14,TRIB3,TIAM1,GPSM1,NKX3-1,MIR148A,DAB2IP,PIN1,AMFR,MFNG,PTPRF,LDLRAP1,ADAM15,RAN,LRP1,TTBK2,MAP2,TMEM173,DISC1,PHLDA2,APP,AURKB,DVL1,SPPL3,BDNF,BAK1,DTNBP1,DDX11,PLXND1,PRKN,EPB41,MAPRE3,HIP1R,TGFBR3,ADD2,TNFSF11,NRP1,GTF2F1,NRG1,MET,PDGFB,TTBK1,ABL1,CAV1,HSF1,CAMK1,SMARCD3,TLE5,PLK1,EPHA4,NOG,ITGB1BP1,CSNK1E,STMN1,WNT5A,CDON,ACE
GO:0044449	CC	contractile fiber part	2.48631e-05	-10.6021	221	62	0.0192367	3223	18985	PDLIM1,SYNE2,CACNA1D,PALLD,MYL5,SYNPO2L,HRC,ANK1,DES,HSPB1,IGSF22,FLNA,CSRP2,SDC4,PGM5,SCN8A,TPM2,PDLIM2,PLEC,JUP,NEXN,KCTD6,FHOD3,CACNA1C,FLNC,PSEN2,NOS1AP,BAG3,BIN1,PARVB,SCN3B,PECAM1,HABP4,JPH1,ANK2,XIRP2,DNAJB6,FKBP1B,AHNAK,SCN5A,MYL9,ANK3,MYOM2,AHNAK2,SYNPO,PDE4B,TMOD1,C10orf71,DMD,STUB1,SYNC,MYOZ3,DST,MYBPC1,GLRX3,FERMT2,LDB3,OBSL1,FBXO32,MYBPC2,HOMER1,FLNB
GO:0031594	CC	neuromuscular junction	2.57423e-05	-10.5674	76	28	0.00868756	3223	18985	NRG1,DLG4,KCNC4,LRP4,SPOCK1,ANK3,STXBP5L,DLG2,DLGAP4,SERPINE2,CDK5R1,CHRNB1,SYNC,P2RX7,EPHA4,CIB2,ACHE,APP,DES,LAMA5,NEFL,DLGAP3,DLG3,SNTA1,TBC1D24,SYNGR1,MYH10,EPHA7
GO:0030175	CC	filopodium	2.6305e-05	-10.5458	104	35	0.0108594	3223	18985	FGD4,MAP2,APBB1,PALM,MYO1B,TUBB3,NPTX2,ITGA6,BAIAP2,SRCIN1,ITGA3,TIAM2,DMD,ADGRA2,ENAH,GPM6A,ITGB3,APP,UNC5C,FSCN1,EPHA4,FARP1,SYNE2,INPPL1,KITLG,SHTN1,IGF2BP1,CYFIP1,NLGN1,HLA-G,RAPGEF3,ABI2,NPTXR,CXADR,FZD3
GO:0060840	BP	artery development	2.74651e-05	-10.5026	87	31	0.00998068	3106	18054	LRP1,TBX1,SMAD6,ACVRL1,MYLK,FOXF1,NOTCH3,SIX1,PRICKLE1,NOG,FOXC2,VEGFA,HPGD,PLXND1,BMP4,WNT11,FOXH1,MYH10,LTBP1,SNX17,GLI3,SOX4,ENG,LUZP1,NRP1,NKX3-1,DLL4,ZMIZ1,TAB1,BMPR1A,SHH
GO:0035137	BP	hindlimb morphogenesis	3.00059e-05	-10.4141	36	17	0.00547328	3106	18054	WNT3,BMP4,ZBTB16,FMN1,MSX1,TWIST1,SHH,BMPR1A,RARG,AFF3,MSX2,ALX3,OSR2,HOXD9,WNT7A,RSPO2,SALL3
GO:0003714	BP	transcription corepressor activity	3.17185e-05	-10.3586	238	66	0.0212492	3106	18054	YBX3,LHX9,KLF12,KCTD1,HDAC3,E2F8,CTBP2,NR2F2,TLE1,PPP1R13L,NACC2,ZHX1,KCNIP3,BCOR,TLE5,JDP2,YAP1,CDYL2,NSD1,MTA3,ZHX3,MAP3K10,RIOX2,PIAS4,PEX14,SMARCA4,TRIB3,TBL1X,HOMEZ,AJUBA,SKI,TONSL,SCAI,SKOR1,HR,DNMT3A,MTA1,SFMBT2,E4F1,ZMYND11,ARID5A,ID4,NEUROD2,YY1,ZNF366,MIER3,RCOR2,MXD4,CDYL,ZFPM2,SFMBT1,THRB,MTA2,MIER2,RBFOX2,TFCP2L1,SAP30,DNMT3B,ATN1,BATF3,E2F7,TLE2,HEYL,DDX54,PAWR,RLIM
GO:0035115	BP	embryonic forelimb morphogenesis	3.41069e-05	-10.286	33	16	0.00515132	3106	18054	MSX1,TWIST1,CRABP2,SHOX2,HOXA11,CACNA1C,SHH,EN1,WNT3,RSPO2,WNT7A,WNT9A,HOXD9,ALX3,MSX2,OSR2
GO:0060993	BP	kidney morphogenesis	3.49676e-05	-10.2611	84	30	0.00965873	3106	18054	FOXD1,CITED1,NOG,SMO,PRKX,SIX1,HNF1B,KLHL3,GCNT1,WT1,LAMA5,MYC,IRX2,SIX2,SHH,PAX2,HOXA11,FMN1,PGF,GCNT4,VANGL2,FGF2,CTNNBIP1,SOX4,GLI3,KIF26B,IRX3,WNT11,BMP4,WNT7B
GO:0072522	BP	purine-containing compound biosynthetic process	3.49867e-05	-10.2605	163	49	0.0157759	3106	18054	MTHFD1,ATP5MC2,AK5,HACD1,PPT1,ADSSL1,AK4,HPRT1,ADCY3,PRTFDC1,PRPS1,ADCY9,MTHFD1L,NPR1,NT5E,ATP5ME,ACOT7,PRPS2,NPR2,ACSS1,GUCY1B1,ATIC,ELOVL7,ADCY7,APRT,ELOVL5,ATP5PF,SCD5,PANK1,MTAP,ELOVL6,SHMT1,SLC35B2,ADAL,GUCY1A2,ELOVL2,NPPC,NME2,HACD2,DLAT,ADCY5,ACACA,ADK,PPCS,GUCY1A1,NME4,FASN,GMPR,ADA2
GO:0021549	BP	cerebellum development	3.54391e-05	-10.2477	100	34	0.0109466	3106	18054	TTBK2,SMO,CDK5R2,LPAR1,SPTBN2,ZNF365,ATIC,SCN5A,TRNP1,EN1,SERPINE2,CKB,MYH10,PTPRS,CDK5R1,WHRN,CBLN1,PPARGC1A,ABL1,RORA,OPHN1,FZD4,WNT7A,ABAT,NEUROD1,GLI1,SDF4,NANOS1,NAGLU,MAP2K1,DLL1,SEZ6L,GBX1,NEUROD2
GO:0014020	BP	primary neural tube formation	3.56885e-05	-10.2407	96	33	0.0106246	3106	18054	SDC4,LUZP1,VANGL2,TRIM71,TSC2,BMP4,PRKACB,PLXNB2,PTK7,SKI,KDM2B,FZD6,FZD3,CELSR1,PAX2,TWIST1,SALL4,RARG,MTHFD1L,LHX2,APAF1,DVL1,FZD2,NOG,MTHFD1,PRICKLE1,WNT5A,TSC1,OVOL2,SFRP2,CC2D2A,ABL1,FZD1
GO:0030516	BP	regulation of axon extension	3.56885e-05	-10.2407	96	33	0.0106246	3106	18054	RTN4R,MEGF8,WNT3,NRP1,SEMA4F,MAP3K13,SEMA5B,ABL1,SEMA4G,WNT5A,NTN1,MAP1B,DRAXIN,LIMK1,CYFIP1,BARHL2,MACF1,DBN1,CDK5R1,PLXNA3,PTPRS,CDH4,LRP1,MAP2,NRCAM,FN1,DPYSL2,SHTN1,NKX6-1,DISC1,SEMA3F,VEGFA,CXCL12
GO:0042813	BP	Wnt-activated receptor activity	3.71911e-05	-10.1994	18	11	0.00354153	3106	18054	LRP5,EGF,FZD5,FZD7,FZD8,ROR1,FZD4,FZD6,FZD2,FZD3,FZD1
GO:0048333	BP	mesodermal cell differentiation	4.09222e-05	-10.1038	27	14	0.00450741	3106	18054	FGFR2,PAX2,FOXC2,HOXA11,HMGA2,ITGA3,SMAD1,ITGB3,FOXF1,ITGB4,ITGA2,KLF4,BMP4,SIX2
GO:0043292	CC	contractile fiber	4.35178e-05	-10.0423	234	64	0.0198573	3223	18985	KCTD6,PLEC,TPM2,PGM5,SCN8A,SDC4,ANK1,PALLD,CACNA1D,MYL5,SYNPO2L,SYNE2,HOMER1,CDK5R1,MYBPC2,FLNB,MYBPC1,STUB1,SYNC,C10orf71,TMOD1,AHNAK2,SYNPO,SCN5A,ANK2,XIRP2,ACTG1,HABP4,PECAM1,JPH1,NOS1AP,FLNC,CACNA1C,NEXN,JUP,PDLIM2,CSRP2,FLNA,IGSF22,DES,HSPB1,HRC,PDLIM1,GLRX3,FBXO32,FERMT2,OBSL1,LDB3,DST,MYOZ3,DMD,PDE4B,MYOM2,AHNAK,MYL9,ANK3,FKBP1B,DNAJB6,SCN3B,PARVB,BAG3,BIN1,PSEN2,FHOD3
GO:0003231	BP	cardiac ventricle development	4.43324e-05	-10.0238	130	41	0.0132003	3106	18054	HEYL,MATR3,DSP,CCN1,SCN5A,PTK7,BMP4,WNT11,FOXH1,VANGL2,TBX20,SOX4,LUZP1,FGFRL1,DLL4,FZD1,PKP2,SMARCD3,SMAD6,FOXF1,SFRP2,ZFPM2,WNT5A,HEG1,MIR17HG,CPE,MESP1,FOXC2,NOG,FZD2,RXRA,LTBP1,SAV1,ENG,PPP1R13L,NRG1,SALL4,XIRP2,TGFBR3,FGFR2,BMPR1A
GO:0001657	BP	ureteric bud development	4.5232e-05	-10.0037	85	30	0.00965873	3106	18054	WNT11,BMP4,SMAD3,GLI3,KIF26B,CTNNBIP1,FGF2,SMAD1,PGF,SDC4,FMN1,HOXA11,PAX2,FGFR1,FGFR2,SHH,MYC,LAMA5,WT1,RET,SDC1,GDF11,SMAD6,HNF1B,SIX1,FOXC2,NOG,SPRY1,FOXD1,CITED1
GO:0001843	BP	neural tube closure	4.55637e-05	-9.9964	89	31	0.00998068	3106	18054	DVL1,TSC2,APAF1,TRIM71,VANGL2,FZD2,BMP4,TWIST1,PAX2,CELSR1,LHX2,RARG,MTHFD1L,SALL4,SDC4,KDM2B,ABL1,SKI,CC2D2A,SFRP2,FZD3,FZD1,FZD6,PRICKLE1,MTHFD1,PRKACB,NOG,PLXNB2,TSC1,PTK7,WNT5A
GO:0030879	BP	mammary gland development	4.62728e-05	-9.98096	126	40	0.0128783	3106	18054	SOCS2,ESR1,CSF1R,VEGFA,SMO,EGF,DDR1,ITGA2,ARHGAP5,USF2,GOT2,APRT,ZNF703,LRP5,MSX1,AREG,BMP4,FASN,PAM,WNT5A,PRLR,NTN1,HOXD9,STAT5A,LBH,CAV1,IRS2,FOXF1,MSX2,MGMT,NRG1,FGFR2,CAPN1,TNFSF11,NRG3,WNT7B,ERBB4,TNFRSF11A,GLI3,WNT3
GO:0051496	BP	positive regulation of stress fiber assembly	4.73191e-05	-9.9586	51	21	0.00676111	3106	18054	LIMCH1,SDC4,SORBS3,NRP1,SYNPO2L,EPHA1,SMAD3,WNT11,SH3PXD2B,LIMK1,CARMIL1,RAPGEF3,TSC1,ITGB1BP1,LPAR1,TESK1,PPM1E,ABL1,ARHGEF10L,EVL,CCN2
GO:0031345	BP	negative regulation of cell projection organization	4.92611e-05	-9.91838	187	54	0.0173857	3106	18054	ITGA3,TLX2,WNT5A,TSC1,SYNGAP1,NTN1,DRAXIN,EPHA4,LRP4,RTN4RL1,MYLIP,SEMA5B,FYN,SEMA4G,UBE3A,LINGO1,NRP1,PTPRG,SEMA4F,KANK1,EVI5L,RTN4R,RGMA,WNT3,SPRY2,GORASP1,DPYSL3,ODF2L,NLGN1,EFNA1,ZNF365,LPAR1,SEMA3F,ARHGAP44,PMP22,EVL,PRNP,MAP4,LRP1,MAP2,EPHA7,RAP1GAP,RTN4RL2,EFNB2,EPHB2,FKBP4,CDK5R1,PTPRS,PLXNA3,NGEF,PRAG1,CDK10,SPOCK1,ITM2C
GO:0004713	MF	protein tyrosine kinase activity	4.99805e-05	-9.90388	137	44	0.014062	3129	17306	FGFR1,WEE1,KIT,ABL1,CSF1R,EPHB3,FES,ROR1,FYN,DYRK3,ERBB4,TESK1,MAP2K1,EPHA4,NTRK2,ERBB3,FGFRL1,SCYL1,EPHA1,ROR2,MAP2K7,FGFR3,TYRO3,EPHB6,FGFR2,DDR1,NRP1,MAP2K3,FLT1,INSR,FGFR4,TNK1,MELK,CRIM1,DYRK2,CLK3,RET,EPHA6,DYRK1B,EPHB2,EPHA7,NTRK1,MET,MERTK
GO:0061098	BP	positive regulation of protein tyrosine kinase activity	5.34927e-05	-9.83596	55	22	0.00708307	3106	18054	CSF1R,EPHA4,EGF,ACE,EFNA1,EREG,ERBB3,NCAPG2,FYN,ADORA1,PRNP,SRCIN1,DLG3,DLG4,NTRK2,GAS6,PDGFB,NRG1,BDNF,ADRA2A,LRP8,GPRC5B
GO:0021522	BP	spinal cord motor neuron differentiation	5.41662e-05	-9.82345	34	16	0.00515132	3106	18054	ISL2,NKX6-1,PHOX2A,OLIG2,LHX4,HOXC10,SHH,LBX1,MDGA2,GBX1,GDPD5,GLI3,SOX4,TBX20,NKX2-2,ZC4H2
GO:0072163	BP	mesonephric epithelium development	5.81449e-05	-9.75257	86	30	0.00965873	3106	18054	SIX1,FOXD1,CITED1,FOXC2,SPRY1,NOG,MYC,SDC1,RET,WT1,LAMA5,GDF11,SMAD6,HNF1B,SMAD1,SDC4,PGF,HOXA11,FMN1,SHH,FGFR1,FGFR2,PAX2,BMP4,WNT11,SMAD3,FGF2,GLI3,CTNNBIP1,KIF26B
GO:0072164	BP	mesonephric tubule development	5.81449e-05	-9.75257	86	30	0.00965873	3106	18054	SMAD1,PGF,SDC4,FMN1,HOXA11,PAX2,FGFR1,FGFR2,SHH,WNT11,BMP4,SMAD3,KIF26B,GLI3,CTNNBIP1,FGF2,SIX1,SPRY1,FOXC2,NOG,CITED1,FOXD1,MYC,LAMA5,SDC1,RET,WT1,GDF11,SMAD6,HNF1B
GO:0060606	BP	tube closure	5.81686e-05	-9.75216	90	31	0.00998068	3106	18054	CELSR1,PAX2,TWIST1,SDC4,SALL4,MTHFD1L,RARG,LHX2,VANGL2,TRIM71,APAF1,DVL1,TSC2,BMP4,FZD2,NOG,PRICKLE1,PRKACB,MTHFD1,WNT5A,TSC1,PLXNB2,PTK7,CC2D2A,SFRP2,SKI,ABL1,KDM2B,FZD6,FZD1,FZD3
GO:0048546	BP	digestive tract morphogenesis	5.82925e-05	-9.75004	48	20	0.00643915	3106	18054	HNF1B,FOXF1,SFRP2,EPHB3,SIX2,RBPMS2,NKX2-3,GLI1,WNT5A,OVOL2,GLI3,VANGL2,SMAD3,WNT11,SOX17,BMP4,FGFR2,SHH,SHOX2,TCF7
GO:0030017	CC	sarcomere	5.84569e-05	-9.74722	204	57	0.0176854	3223	18985	TPM2,SCN8A,PGM5,PDLIM2,JUP,KCTD6,NEXN,SYNE2,PDLIM1,DES,HSPB1,ANK1,HRC,SYNPO2L,CACNA1D,PALLD,IGSF22,CSRP2,FLNA,MYL9,ANK3,SCN5A,FKBP1B,PDE4B,SYNPO,AHNAK2,MYOM2,DMD,SYNC,STUB1,TMOD1,C10orf71,FLNB,HOMER1,MYBPC2,FERMT2,FBXO32,GLRX3,LDB3,OBSL1,MYBPC1,MYOZ3,DST,CACNA1C,FHOD3,BAG3,BIN1,NOS1AP,PSEN2,FLNC,JPH1,HABP4,SCN3B,PARVB,DNAJB6,XIRP2,ANK2
GO:0042813	MF	Wnt-activated receptor activity	6.014e-05	-9.71884	18	11	0.0035155	3129	17306	FZD2,LRP5,FZD8,EGF,FZD6,ROR1,FZD1,FZD4,FZD5,FZD7,FZD3
GO:0045665	BP	negative regulation of neuron differentiation	6.63427e-05	-9.62068	225	62	0.0199614	3106	18054	RTN4RL2,LBX1,FKBP4,EPHB2,SHH,SLC6A4,EFNB2,PTPRS,PLXNA3,CDK5R1,NGEF,IRX3,PRAG1,SPOCK1,ITM2C,ZNF365,NLGN1,DPYSL3,EFNA1,GORASP1,LPAR1,FUOM,NOTCH3,SEMA3F,APP,PMP22,MAP2,LRP1,OLIG2,EPHA7,GDF11,UBE3A,ZNF536,LINGO1,PTPRG,NRP1,KANK1,SEMA4F,ID4,DLL1,EDNRB,MIB1,RGMA,RTN4R,NKX2-2,GLI3,WNT3,THRB,TSC1,TLX2,WNT5A,NTN1,SYNGAP1,ISL2,EPHA4,DLX2,DRAXIN,LRP4,RTN4RL1,MYLIP,SEMA5B,SEMA4G
GO:0050840	MF	extracellular matrix binding	6.92114e-05	-9.57835	57	23	0.00735059	3129	17306	TGFBI,OLFML2A,TINAGL1,ITGA2B,NTN4,LYPD3,LYPD5,BCAM,NID1,ACHE,AGRN,SPOCK3,CCN1,GPC1,ADAMTS5,ITGA3,VEGFA,ITGA2,SHH,SPOCK1,ITGA6,SPOCK2,ITGB3
GO:0060688	BP	regulation of morphogenesis of a branching structure	7.38967e-05	-9.51284	56	22	0.00708307	3106	18054	SHOX2,SHH,FGFR2,FGFR1,PAX2,NTN4,PGF,BMP4,HOXB7,RXRA,WNT2B,SMO,ESR1,VEGFA,NOG,WNT5A,SIX1,ABL1,SIX4,HNF1B,SIX2,MAP3K13
GO:0060415	BP	muscle tissue morphogenesis	7.42174e-05	-9.50851	83	29	0.00933677	3106	18054	FZD1,PKP2,TBX1,MYBPC2,IGSF22,MYLK,ZFPM2,DSP,WNT5A,HEG1,MYBPC1,NOG,FOXC2,BMP4,MYOM2,FZD2,RXRA,FOXH1,TBX20,VANGL2,ENG,NRG1,SHOX2,DLL4,FGFR2,XIRP2,TGFBR3,OBSL1,BMPR1A
GO:0030016	CC	myofibril	7.43006e-05	-9.50739	224	61	0.0189265	3223	18985	FKBP1B,ANK3,MYL9,AHNAK,SCN5A,SYNPO,AHNAK2,MYOM2,PDE4B,TMOD1,C10orf71,SYNC,DMD,STUB1,MYBPC1,MYOZ3,DST,FLNB,MYBPC2,HOMER1,GLRX3,FERMT2,FBXO32,LDB3,OBSL1,CACNA1C,FHOD3,PSEN2,FLNC,BIN1,BAG3,NOS1AP,PARVB,JPH1,SCN3B,HABP4,ACTG1,XIRP2,DNAJB6,ANK2,PGM5,SCN8A,TPM2,PDLIM2,JUP,PLEC,KCTD6,NEXN,PDLIM1,SYNE2,SYNPO2L,CACNA1D,PALLD,ANK1,HSPB1,HRC,DES,IGSF22,FLNA,SDC4,CSRP2
GO:0008021	CC	synaptic vesicle	7.45977e-05	-9.5034	192	54	0.0167546	3223	18985	SNAP91,SLC30A3,AMPH,KIF1A,RAB26,SLC32A1,BACE1,APP,SYNGR1,SV2C,ROGDI,SNCA,SYT6,RNF112,SLC6A9,PICK1,DOC2A,SCAMP1,DISC1,ZNRF1,VDAC1,SYT9,DNM1,RABAC1,HCRT,OTOF,PTPRS,SLC9B2,KCNK9,APBA1,DTNBP1,APBA2,SEPTIN8,PPT1,PSEN2,PRRT2,BIN1,CDK16,SNAP25,PTPRN2,BDNF,TMEM163,STON2,WFS1,CTTNBP2,DLG4,CBARP,RAB3B,SYPL2,PDE4B,SLC2A8,SEPTIN6,STX2,LAMP5
GO:0030323	BP	respiratory tube development	7.63824e-05	-9.47976	172	50	0.0160979	3106	18054	RSPO2,PTK7,VEGFA,SIM2,MMP14,ERRFI1,LAMA5,EDN2,RBP4,TAB1,FGFR1,HHIP,SHH,TNS3,WNT11,BMP4,TRAF4,LOXL3,PCSK5,VANGL2,LTBP3,ZFPM2,ADAMTS2,THRB,GLI1,WNT5A,MIR17HG,ITGA3,HEG1,FGF18,DLG5,SPRY1,NOG,YAP1,CCN2,EIF4EBP1,FSTL3,FOXF1,FOXA1,MAP2K1,ZIC3,BMPR1A,HSPB11,CELSR1,FGFR2,WNT7B,HS6ST1,SPRY2,SAV1,GLI3
GO:0030027	CC	lamellipodium	8.6716e-05	-9.35287	193	54	0.0167546	3223	18985	FGD4,AJUBA,DPYSL3,PTPRM,APBB1,TUBB3,DPP4,MYH10,PARVB,ABLIM3,SRCIN1,MYLK,NME2,TIAM2,FERMT2,STX2,NHS,RAB3IP,AMOTL1,AMOT,LIMK1,ENAH,UNC5C,APP,ITGB3,TSC1,MTSS2,CDC42BPA,FSCN1,PALLD,DBN1,PIEZO1,INPPL1,GSN,EVL,CDH2,SYNE2,KITLG,PLXND1,SHTN1,PLCG1,KCNA2,ITGB1BP1,CDC42BPB,IGF2BP1,CYFIP1,CAPG,RAC3,RAPGEF3,CTNNA1,CARMIL1,ABI2,SLC39A14,WASF3
GO:0031016	BP	pancreas development	9.19354e-05	-9.29442	72	26	0.0083709	3106	18054	NEUROD1,NKX6-1,WNT5A,SMO,PDX1,ONECUT2,GDF11,NKX3-2,INSR,WFS1,HNF1B,NEUROG3,FOXF1,ONECUT1,MET,GIPR,ZIC3,DLL1,SHH,BMP4,ILDR2,NKX2-2,NR5A2,BAK1,INSM1,SOX4
GO:0061035	BP	regulation of cartilage development	9.19354e-05	-9.29442	72	26	0.0083709	3106	18054	WNT11,BMP4,RFLNA,SMAD3,ZBTB16,GLI3,LOXL2,RARG,SMAD1,SHOX2,MAF,HOXA11,TAPT1,SIX2,CCN2,GDF6,NKX3-2,ACVRL1,ZNF219,LTBP3,CCN1,WNT5A,FGF18,NOG,AXIN2,WNT9A
GO:0003151	BP	outflow tract morphogenesis	9.37971e-05	-9.27438	76	27	0.00869285	3106	18054	ZFPM2,SOX18,SIX1,MIR17HG,WNT5A,NOG,VEGFA,FZD1,HEYL,TBX1,MSX2,SMAD6,SFRP2,NRP1,TWIST1,BMPR1A,FGFR2,TGFBR3,PLXND1,FZD2,SOX17,WNT11,BMP4,FOXH1,DHRS3,ENG,TBX20
GO:0051492	BP	regulation of stress fiber assembly	9.49127e-05	-9.26255	84	29	0.00933677	3106	18054	TESK1,PPM1E,TMEFF2,ABL1,ARHGEF10L,EVL,CCN2,LIMK1,CARMIL1,RAPGEF3,TSC1,ITGB1BP1,LPAR1,STMN1,ASAP3,ALMS1,EPHA1,PHLDB2,SMAD3,WNT11,SH3PXD2B,CORO2B,LIMCH1,SDC4,SORBS3,MIR149,NRP1,MET,SYNPO2L
